# Supplementary material for: Predicting spatio‐temporal population patterns of Borrelia burgdorferi, the Lyme disease pathogen
Source: PubMed Central journal article supplement — J Appl Ecol. 2022 Sep 13;59(11):2779–89. doi: 10.1111/1365-2664.14274 (PMC9826398; doi:10.1111/1365-2664.14274), 2022-09-13

**Figure S3** The prevalence of *Borrelia burgdorferi* infected nymphs generally increased non-uniformly across New York State between 2009 and 2019 (A) Counties in NYS were divided into areas that were geographically adjacent to one another. Apart from NYC which was excluded from analyses as discussed in the methods, gray counties represent ticks were not collected or were only collected for a year. (B) The total number of ticks collected and and infected ticks were summed across all sites for each county. A best-fit linear regression line was fitted through the NIP across years.

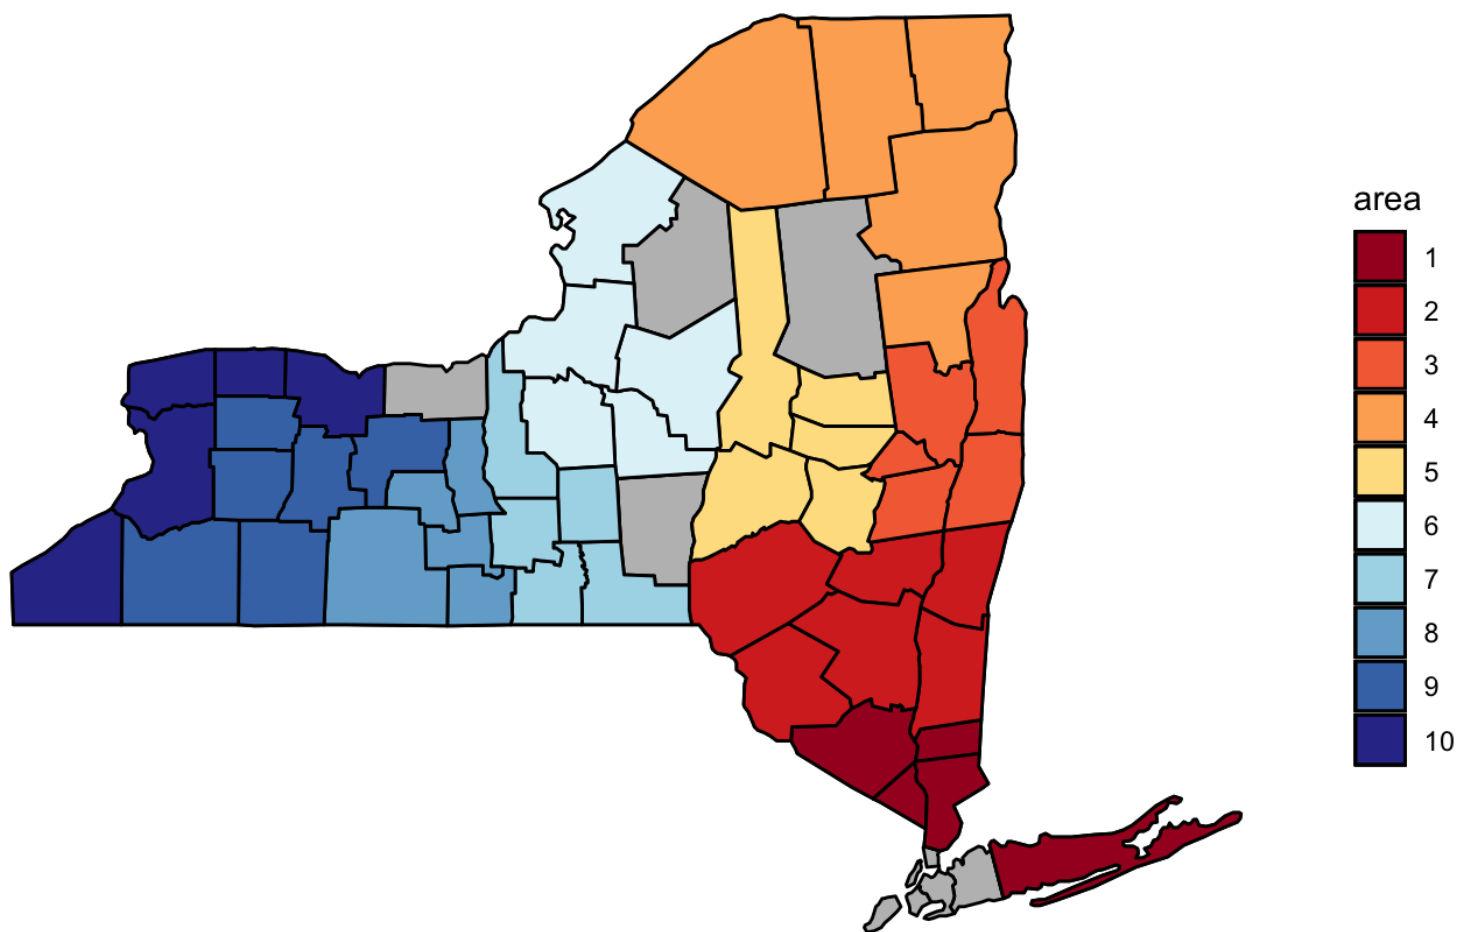

Area 1

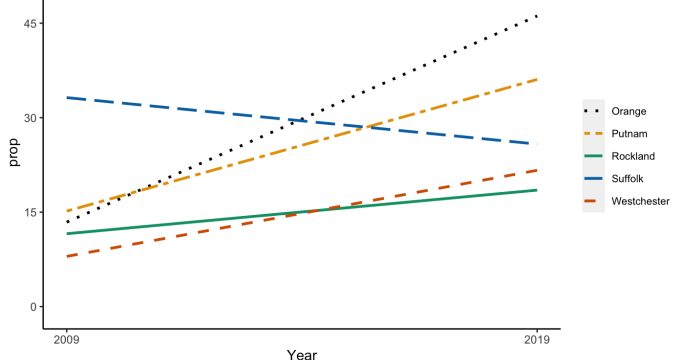

Area 2

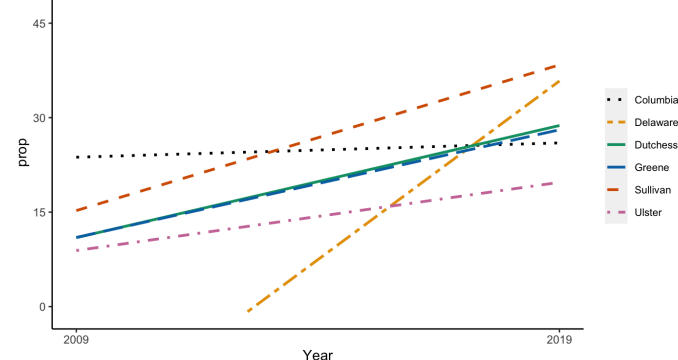

Area 3

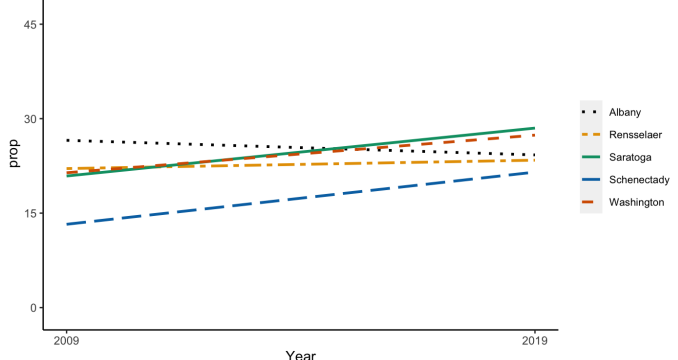

Area 4

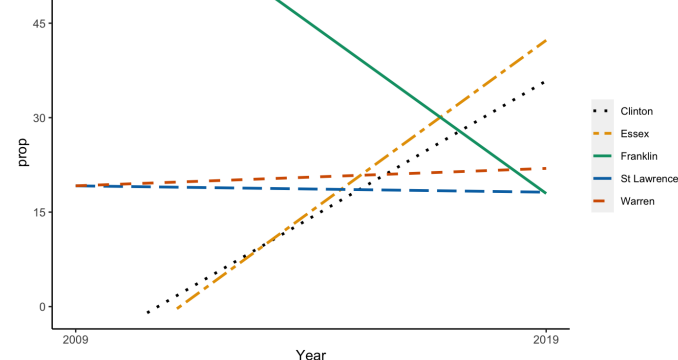

Area 5

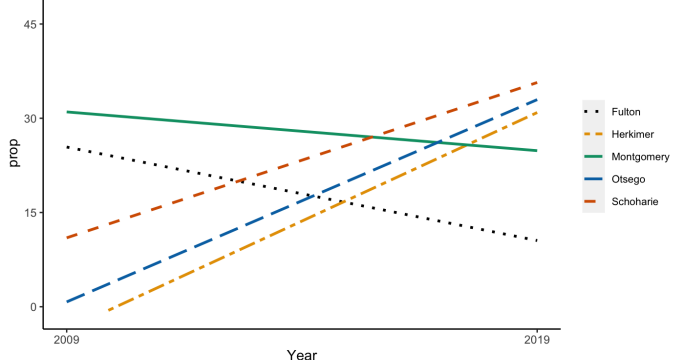

Area 6

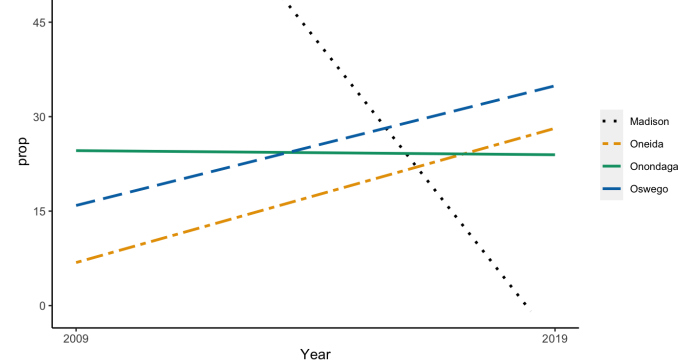

Area 7

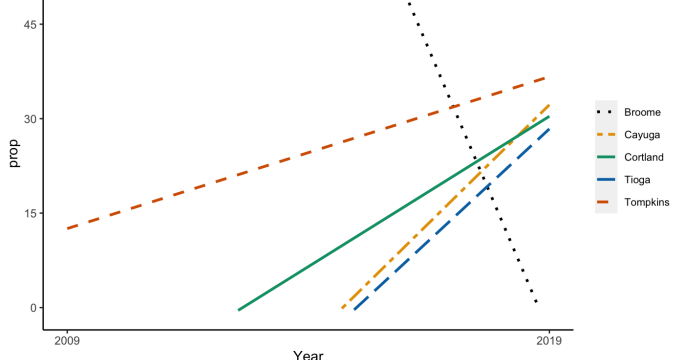

Area 8

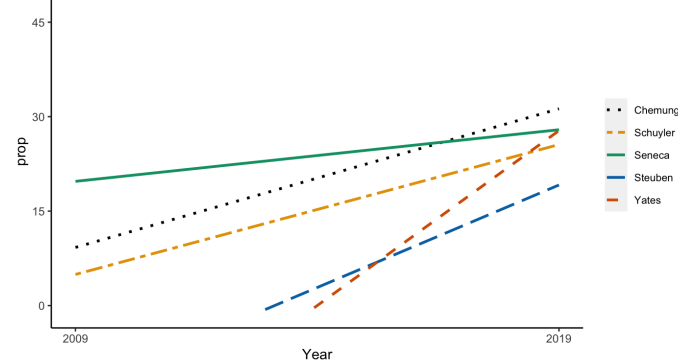

Area 9

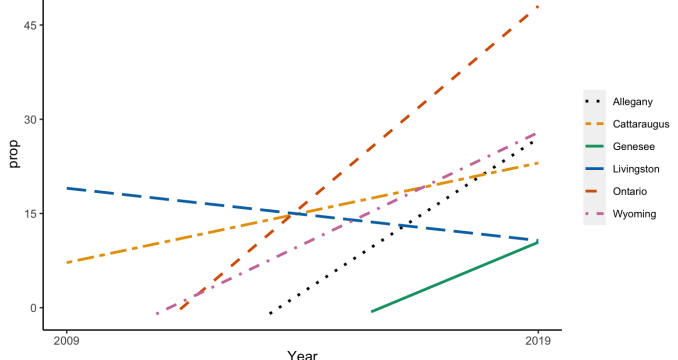

Area 10

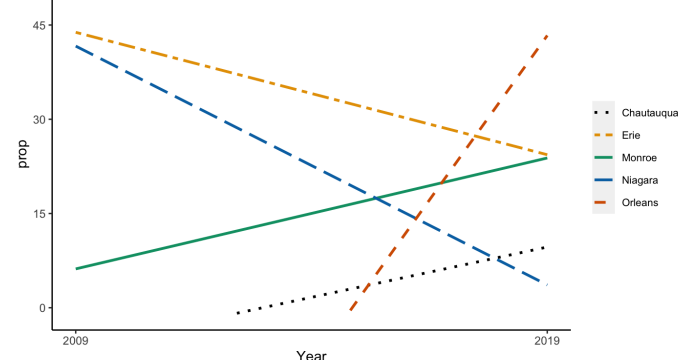

Supplement: JPE-59-2779-s001.pdf [file JPE-59-2779-s001.pdf]
